# Supplementary material for: Correlation between nucleation, phase transition and dynamic melt-crystallization kinetics in PAni/PVDF blends
Source: Royal Society of Chemistry journal article supplement (doi:10.1039/c5ra15989j), 2015-01-01
Supplement: c5ra15989j1.pdf [file c5ra15989j1.pdf]

## Supplementary Information

### Correlation between nucleation, phase transition and dynamic melt-crystallization kinetics in PAni/PVDF blends

Swarup Biswas, Bula Dutta and Subhratanu Bhattacharya\*

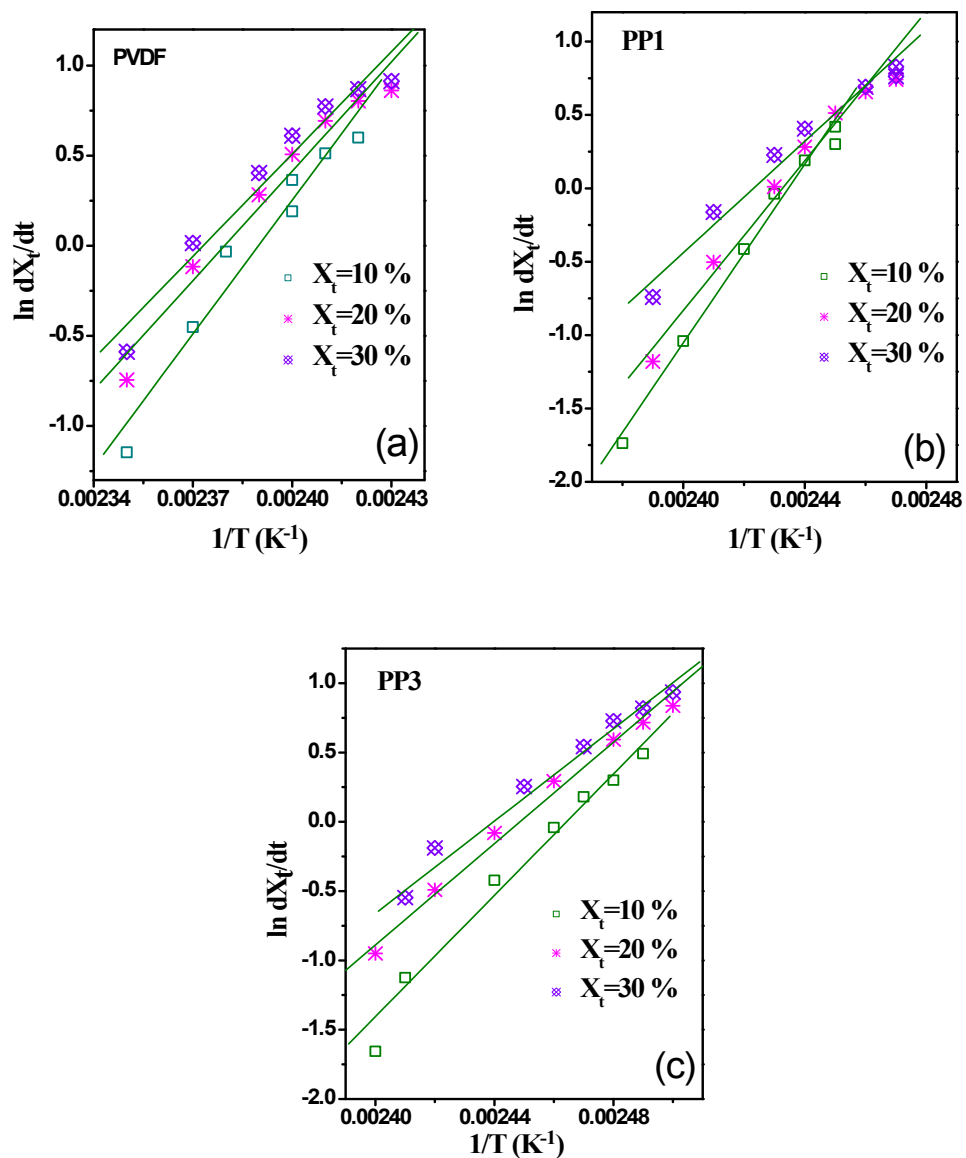

Fig. S1 Linear variation of the logarithm of instantaneous crystallization rate with inverse of average temperatures for the non-isothermal crystallization of (a) PVDF and (b)-(c) PAni/PVDF blends, at different cooling rates for relative degrees of crystallinities 10, 20, and 30% respectively. The slopes of the straight line fits give the values of effective activation energy according to the Friedman method.
